# Supplementary material for: The formation of haloacetamides, as an emerging class of N-DBPs, from chlor(am)ination of algal organic matter extracted from Microcystis aeruginosa, Scenedesmus quadricauda and Nitzschia palea
Source: Royal Society of Chemistry journal article supplement (doi:10.1039/c6ra26848j), 2017-01-01
Supplement: c6ra26848j1.pdf [file c6ra26848j1.pdf]

*Supplement Materials for*

**The Formation of Haloacetamides, an Emerging Class of N-DBPs from  
Chlor(am)ination Algal Organic Matter Extracted from *Microcystis aeruginosa*,  
*Scenedesmusquadricauda* and *Nitzschia palea***

Ni Zhang <sup>1</sup>, Chao Liu <sup>2</sup>, Fei Qi <sup>1\*</sup>, Bingbing Xu <sup>3\*\*</sup>

<sup>1</sup> Beijing Key Lab for Source Control Technology of Water Pollution, College of Environmental Science and Engineering, Beijing Forestry University, Beijing 100083, PR China

<sup>2</sup> Beijing Water Science Technology Institute, Beijing, 100048, P.R. China

<sup>3</sup> State Key Laboratory of Environmental Criteria and Risk Assessment, Chinese Research Academy of Environmental Sciences, Beijing 100012, PR China

Corresponding Author, Prof. Fei Qi

Tel.: +86 10 62336615; Fax: +86 10 62336596; [qifei@bjfu.edu.cn](mailto:qifei@bjfu.edu.cn)

Co-corresponding Author, Dr. Bingbing Xu

[xbb\\_hit@126.com](mailto:xbb_hit@126.com)

Table S1 The component of BG-11 culture medium

| Chemical Name                 | Chemical Formula                               | Concentration (mg/L) |
|-------------------------------|------------------------------------------------|----------------------|
| Sodium nitrate                | NaNO <sub>3</sub>                              | 100.0                |
| Sodium carbonate              | Na <sub>2</sub> CO <sub>3</sub>                | 20.0                 |
| Magnesium sulfate             | MgSO <sub>4</sub> ·7H <sub>2</sub> O           | 75.0                 |
| Potassium Phosphate Monobasic | KH <sub>2</sub> PO <sub>4</sub>                | 10.0                 |
| Calcium Chloride Dihydrate    | CaCl <sub>2</sub> ·2H <sub>2</sub> O           | 40.0                 |
| EDTA                          | Na <sub>2</sub> EDTA·2H <sub>2</sub> O         | 1.0                  |
| Fe(III)-citrate complex       | C <sub>6</sub> H <sub>5</sub> FeO <sub>7</sub> | 6.0                  |

Table S2 The component of D-11 culture medium

| Chemical Name                             | Chemical Formula                                    | Requirements                                                        |          |
|-------------------------------------------|-----------------------------------------------------|---------------------------------------------------------------------|----------|
| Sodium nitrate                            | $\text{NaNO}_3$                                     | 30 g                                                                |          |
| Dipotassium hydrogen phosphate trihydrate | $\text{K}_2\text{HPO}_4 \cdot 3\text{H}_2\text{O}$  | 10 g                                                                |          |
| Magnesium sulfate                         | $\text{MgSO}_4 \cdot 7\text{H}_2\text{O}$           | 17.5 g                                                              |          |
| Potassium Phosphate Monobasic             | $\text{KH}_2\text{PO}_4$                            | 20 g                                                                |          |
| Calcium Chloride Dihydrate                | $\text{CaCl}_2 \cdot 2\text{H}_2\text{O}$           | 5 g                                                                 |          |
| Sodium silicate                           | $\text{Na}_2\text{SiO}_3 \cdot 9\text{H}_2\text{O}$ | 25 g                                                                |          |
| Sodium chloride                           | $\text{NaCl}$                                       | 2.5 g                                                               |          |
| Manganese(II) sulfate tetrahydrate        | $\text{MnSO}_4 \cdot 4\text{H}_2\text{O}$           | 0.05 g                                                              |          |
| Fe(III)-citrate complex                   | $\text{C}_6\text{H}_5\text{FeO}_7$                  | 1.25 g                                                              |          |
| A5                                        | Orthoboric acid                                     | $\text{H}_3\text{BO}_3$                                             | 715 mg   |
| solution                                  | Manganese(II) sulfate tetrahydrate                  | $\text{MnSO}_4 \cdot 4\text{H}_2\text{O}$                           | 452.5 mg |
|                                           | Zinc sulfate heptahydrate                           | $\text{ZnSO}_4 \cdot 7\text{H}_2\text{O}$                           | 55 mg    |
|                                           | Copper sulfate pentahydrate                         | $\text{CuSO}_4 \cdot 5\text{H}_2\text{O}$                           | 19.75 mg |
|                                           | Ammonium molybdate tetrahydrate                     | $(\text{NH}_4)_6\text{Mo}_7\text{O}_{24} \cdot 4\text{H}_2\text{O}$ | 9.75 mg  |

Table S3 GC analysis retention time of Cl-HAcAm and QA/QC

| Cl-HAcAm Name                  | Retention time<br>(min) | The minimum<br>detection limit<br>(MDL, µg/L) | Recovery<br>efficiency (%) |
|--------------------------------|-------------------------|-----------------------------------------------|----------------------------|
| Chloroacetamide<br>(CAcAm)     | 14.464                  | 3.5                                           | 94.6                       |
| Dichloroacetamide<br>(DCAcAm)  | 17.003                  | 2.7                                           | 98.3                       |
| Trichloroacetamide<br>(TCAcAm) | 17.955                  | 0.07                                          | 87.7                       |
